# Supplementary material for: Reliable Wolf-Dog Hybrid Detection in Europe Using a Reduced SNP Panel Developed for Non-Invasively Collected Samples
Source: Research Square preprint supplement (doi:10.21203/rs.3.rs-113866/v1), 2020-12-01
Supplement: Supplementary file 1 [file 33cadba24266c168dc456f19.xlsx]

## Sheet: Final panel
SNP name	Chr	Position (CanFam2)	Position (CanFam3)	Allele 1	FreqWOLF_all	FreqWOLF_EastEurope	FreqWOLF_IT	FreqWOLF_IB	FreqDOG	FreqJACKAL††	FreqFOX††	Allele 2	FreqWOLF_all	FreqWOLF_EastEurope	FreqWOLF_IT	FreqWOLF_IB	FreqDOG	FreqJACKAL††	FreqFOX††	ASP1_SEQ (forward allele1)	ASP2_SEQ (forward allele2)	LSP_SEQ (reverse)	STA_SEQ (forward STA step)
BICF2P878735	2	59404052	56535052	A	0	0	0	0	0.7348	0	0	G	1	1	1	1	0.2652	1	1	GACTACAGAAATCCGCTCTCCAT	ACTACAGAAATCCGCTCTCCAC	TCGCCTGTTACAGCTTTCCCA	TGGGCACTTCCAGGACA
BICF2P779255	11	73097995	70068128	T	0	0	0	0	0.7376	0.3333	NA	A	1	1	1	1	0.2624	0.6667	NA	TTGCATATGAGCATGCTACATTTTGA	TTGCATATGAGCATGCTACATTTTGT	CCCCCTCTCATGTGGTTCAGA	GCATTCATAGAAGCCCTGATTCTG
G750f39S170	12	40806042	37802395	T	0	0	0	0	0.7395	0	0	C	1	1	1	1	0.2605	1	1	CCTTCAGGATAATTGAGTCAAGAAATTGAT	CCTTCAGGATAATTGAGTCAAGAAATTGAC	ACTAATTCTCACCAATATCAAACTTATTCAGAGACC	AGCTTTCTGCTTGTCTGTTTTACA
BICF2S23033793	37	21935224	18935566	A	0	0	0	0	0.7414	0	0	G	1	1	1	1	0.2586	1	1	GAATCTGTTGTTTGTTTCACATGGGA	ATCTGTTGTTTGTTTCACATGGGG	TGCTCATAGAGCAAAGGTTAAAGGAAGT	CCTATTCCCCAAAATGATCAAACCA
BICF2P1122577	28	32059012	29058281	C	0	0	0	0	0.7462	0	0	T	1	1	1	1	0.2538	1	1	ATGTTAACTGATTCCATTTATTACCATGTCAG	GATGTTAACTGATTCCATTTATTACCATGTCAA	TCTGAAGTTAGCAGAAATAACAAAGTTTTAAATAAAAGAA	AAATTGTGGAGCTTTTTAAATTGAATAGATGT
BICF2G630115554	16	38079477	35124987	T	0	0	0	0	0.7471	0	0	C	1	1	1	1	0.2529	1	1	TTTCCAGTCATTTTTACAGAGGGTTAGA	TCCAGTCATTTTTACAGAGGGTTAGG	TCAGGAAAATTTCAATGGAATAAGTTCTTTGTGATT	CATTTCCCTCATGTACATCTTTTGTC
BICF2S236916	19	17950393	14945857	T	0	0	0	0	0.7567	0	0	C	1	1	1	1	0.2433	1	1	CTAGAACCTTCCCTCAGAATTTCCTTTA	GAACCTTCCCTCAGAATTTCCTTTG	GCAATAGGGTAAATAAATTACACCTAATTACAGAAACTC	CCGGGTTGCCCTACAATTATATT
BICF2P1334121	2	32937207	30093818	A	0	0	0	0	0.7708	0	0	G	1	1	1	1	0.2292	1	1	GCCTATCACATCCCACTATCCTTT	GCCTATCACATCCCACTATCCTTC	GCAAGCCAGAAGGGCAAAACA	TGTTGCCATCCTCTTTTCTCTTG
BICF2P521676	2	35346623	32502802	A	0	0	0	0	0.7917	1	0	G	1	1	1	1	0.2083	0	1	CGGTGATCGGACAATTGGTGT	GGTGATCGGACAATTGGTGC	ATTTGCCCGCACTCCTGC	GCTTTCCTCTAACTCCAAGGAAAT
BICF2S23758182	28	35642983	32641862	A	0	0	0	0	0.7992	0	0	G	1	1	1	1	0.2008	1	1	GCCCCTCCCACAACCAT	GCCCCTCCCACAACCAC	AGCGCTCTGATGGCACCT	CTCTTTGTTCCCAAGCCCC
BICF2G630320565	22	19859504	16913009	T	0	0	0	0	0.90152	0	0	C	1	1	1	1	0.09848	1	1	TTCTCCGGAGCATCCAGAAAA	TTCTCCGGAGCATCCAGAAAG	CCTGGGGGTTCATAGCACAGT	CCCAACAAATTTGAAGGCTGAATTA
BICF2P451419	4	77656050	74458441	A	0.001779	0.002688	0	0	0.744	0	0	G	0.998221	0.997312	1	1	0.256	1	1	GGTGCCTATGTTTCCTTTCATTTACATTAAT	GGTGCCTATGTTTCCTTTCATTTACATTAAC	TTTAGTTAGAATGTTATGTAAAATTGAATTGTTGAGAAAA	ACCATTGGCTGTAAAAGTCTTAGG
BICF2G630565160	7	65942668	62908663	A	0.001779	0	0.007143	0	0.7652	0	0	G	0.998221	1	0.992857	1	0.2348	1	1	AGAAAGAAACAAAGACAAAGTTCTATTCTTCA	AGAAAGAAACAAAGACAAAGTTCTATTCTTCG	AGGAGCTTGATGCTCGTGTGT	CAAAGGCACAGAACTAGTACTTCA
BICF2G630843397	16	12115699	9152093	T	0.001779	0	0.007143	0	0.7841	0	0	G	0.998221	1	0.992857	1	0.2159	1	1	CGGACCTTGACCTTGACAGT	CGGACCTTGACCTTGACAGG	GGTCTCCTTCCCTGGAGCA	TGAGGTGAACAGAAGACCGT
BICF2S22912279	15	40739453	37729189	G	0.001792	0	0.007143	0	0.8049	0	0	A	0.998208	1	0.992857	1	0.1951	1	1	AATTGCAAAGGGCAGGAACAC	CAATTGCAAAGGGCAGGAACAT	AGCCTCCAATTACAGATAACCTTGCT	ATCAAGCTGAGAGATGAAATGCAA
BICF2S24115352	3	8332047	5448906	T	0.001866	0.00289	0	0	0.75	0	0	C	0.998134	0.99711	1	1	0.25	1	1	TTCCCAACAAATCCTCCAGTTCT	TCCCAACAAATCCTCCAGTTCC	GCAGGCAGTGTCATGTTGGA	TCCAGGGTTTTTTGTTTTTCCCA
BICF2G630245112	33	5402330	2432073	A	0.003559	0.005376	0	0	0.7557	0	0	C	0.996441	0.994624	1	1	0.2443	1	1	TCTAGGAAGAGGAAAATGATTCCTAATTTGT	CTAGGAAGAGGAAAATGATTCCTAATTTGG	ACCAATCAGTGCTGGGGACA	ACCTAACCAATCCATCTTTCTAGGA
TIGRP2P327375_rs9002871	25	27243309	24260343	A	0.003559	0	0	0.04	0.7739	0	0	T	0.996441	1	1	0.96	0.2261	1	1	TGGAAGCATTTTCCCTCTAATCCT	TGGAAGCATTTTCCCTCTAATCCA	GTGTAAGGTTGCTTATTTTCAAATCGAGTTATCT	TGTCAGTACCTAGTAAAAGACCAACA
BICF2P995528	29	27403451	24402846	T	0.003559	0	0.01429	0	0.7805	0	0	G	0.996441	1	0.98571	1	0.2195	1	1	CACATGTATGAGTTCACTTGATTATGTTGAA	CACATGTATGAGTTCACTTGATTATGTTGAC	CATTATGAATTTTGTACATCCAATGGAGACTGT	AAGCACGTATTTGGAATATGATCACA
BICF2G630317215	22	12411515	9464710	C	0.003559	0.002688	0.007143	0	0.8011	0	NA	T	0.996441	0.997312	0.992857	1	0.1989	1	NA	TCTTAATGTGAATGTTTAAAACCAGTCCAG	TCTTAATGTGAATGTTTAAAACCAGTCCAA	CTTCCATTGATCTGGAGATGGGC	GGTGCACAAAGTATTTCCATTAACC
TIGRP2P216521_rs8707766	16	44638172	41676727	G	0.003571	0.005376	0	0	0.7385	0	0	C	0.996429	0.994624	1	1	0.2615	1	1	CCTCTCTAGGCTTCTGTGTACG	CCTCTCTAGGCTTCTGTGTACC	AACAGTGATATGTTCTATAATACTACAGTTACATATATTT	CATGTGACTATGGCAAGATCAGC
BICF2G630412395	30	4512220	1523168	C	0.003571	0	0.01429	0	0.7538	0	0	T	0.996429	1	0.98571	1	0.2462	1	1	GCTTCTTAGAGTAAATGTCCAGGAGAAG	GCTTCTTAGAGTAAATGTCCAGGAGAAA	CCTTTGGGGAAAGCAGCTGAA	GTGGTTTTGCTAGTTTACTTTTGCT
BICF2G630247224	33	10366434	7350479	T	0.003571	0.005405	0	0	0.8125	0	NA	A	0.996429	0.994595	1	1	0.1875	1	NA	GGTTTAGGTGGTCGCTGAATTTCTA	GTTTAGGTGGTCGCTGAATTTCTT	GAGAAATCAAATAAACAGTAAATTCCAACTCAGAAGT	CCAGAGTGAGCAGGAGAACA
TIGRP2P39029_rs8914036	3	22932700	20048563	C	0.00361	0.005435	0	0	0.7395	0	0	A	0.99639	0.994565	1	1	0.2605	1	1	AGCATATTTTGCATAATAGATTGATCAATACACC	AGCATATTTTGCATAATAGATTGATCAATACACA	CCTGAATTTAGGGGCAGTTGCA	GGGCTTTGGGAATTAAGAAATTACCT
TIGRP2P278990_rs8738286	21	4722506	1725900	C	0.005338	0	0.007143	0.04	0.7595	0	0	T	0.994662	1	0.992857	0.96	0.2405	1	1	GCTGTCTGTGGGCTTCTCG	GCTGTCTGTGGGCTTCTCA	GAGAGCCCCACCATCCCA	TTCTTCTCTGTTAGGTTTGACTTGC
BICF2P1056166	20	16275436	13273535	A	0.005357	0	0.02143	0	0.7197	0	0	C	0.994643	1	0.97857	1	0.2803	1	1	TTTGTGCTACCACTATTGAGCTCTAATA	TGTGCTACCACTATTGAGCTCTAATC	CAAAATACCAAGCAATGAATAATTTTCCATTCAATTCT	GAACATCCTTTTACCACTAGGCTT
BICF2P285168	33	11941510	8926215	T	0.005357	0.008108	0	0	0.7254	0.8333	0	C	0.994643	0.991892	1	1	0.2746	0.1667	1	GCTACATGAGATGAAAGCAAGGTT	GCTACATGAGATGAAAGCAAGGTC	GCCAAGAGAAGGATAGAGAGTCCC	GCTGTGCCAAGTTCATATGTGTTT
BICF2P407965	28	14493972	11496843	G	0.005415	0.008242	0	0	0.6742	0	0	A	0.994585	0.991758	1	1	0.3258	1	1	CCTCTCTGAAATGCCTAGCACTC	CCTCTCTGAAATGCCTAGCACTT	CGGGATGCCTGTTTGTCTCCT	GGCTGCACTCCACAGGA
BICF2S23219794	8	45785493	42749955	C	0.007117	0.01075	0	0	0.8016	0	0	A	0.992883	0.98925	1	1	0.1984	1	1	GATCTGCTCCACTGCCTTTTC	TGATCTGCTCCACTGCCTTTTA	TGGATGAGGCCACAAATGGGT	CCTATGAGAGCTCATTCCAAGTG
BICF2P306813	20	61128041	57982848	A	0.007194	0.002732	0.02143	0	0.7443	0	0	G	0.992806	0.997268	0.97857	1	0.2557	1	1	AGCTAGAAGCACATTTCCCGTTTA	GCTAGAAGCACATTTCCCGTTTG	CGGAGGCCGCAGCAGA	GCGGCTCTTAATGAAGACGGA
TIGRP2P116574_rs8920568	8	7732816	4727630	A	0.007194	0.01093	0	0	0.7973	0	0	G	0.992806	0.98907	1	1	0.2027	1	1	CTGTGACTCACTGATCTGGACAAT	TGTGACTCACTGATCTGGACAAC	AAGCTGCCAAATTCAGCAGCA	GCTCTAGAGCCAACAGCG
BICF2P660709	23	46052279	43000880	A	0.007937	0.01087	0	0	0.827	0	0	T	0.992063	0.98913	1	1	0.173	1	1	CATTGATATTGACCTATGTTAAATATCTTTGCCT	CATTGATATTGACCTATGTTAAATATCTTTGCCA	AAATAGTATATTTCACTTACTTACACTAATGCATTAATGA	AAAGAGACATATTTGAACCTCGAACAA
BICF2S2413175	5	59661467	56660509	A	0.008961	0	0	0.1	0.7708	0	0	G	0.991039	1	1	0.9	0.2292	1	1	GCAGTTAGAAATAGCCCAGTCTCAT	GCAGTTAGAAATAGCCCAGTCTCAC	GCTGCCTAATTGCTGCATGTCA	GGCGTTCGGACAGCATTTG
TIGRP2P116705_rs8955982	8	8453089	5447212	A	0.009025	0	0.02143	0.04	0.7803	0	0	G	0.990975	1	0.97857	0.96	0.2197	1	1	AGAAAGTGTACCTTTTTCCCCCT	AGAAAGTGTACCTTTTTCCCCCC	GGGTCACCAGGAAGACAGGAA	TGACACCTGTTTGACAAAAAGCA
BICF2P1163317	36	32787450	29757924	A	0.01246	0.005376	0.007143	0.08	0.7992	0	NA	T	0.98754	0.994624	0.992857	0.92	0.2008	1	NA	CTCCACCAGACACTGCGATATATATT	CTCCACCAGACACTGCGATATATATA	GCTGCTTTCGGTCGCTCA	CTACGAGATGATACATGGCAGC
BICF2G630402763	30	27734006	24741573	A	0.0125	0.002703	0	0.12	0.7481	0	NA	G	0.9875	0.997297	1	0.88	0.2519	1	NA	GCAATCTACACATGAATTCCTCCCAT	CAATCTACACATGAATTCCTCCCAC	CCCCAAAGTTTGCCTGGGT	TCTTGTCTTAATTTGACAGGGTTCAG
BICF2P291984	1	99091704	96022576	A	0.01254	0.01902	0	0	0.7614	0	0	T	0.98746	0.98098	1	1	0.2386	1	1	GCCTCGTCAGATGATGGATACT	GCCTCGTCAGATGATGGATACA	TCCAGTGCCAGTATCAGTTGCT	GGAATATACTTTGGCAGCCTCG
TIGRP2P303764_rs8754818	23	29244070	26192656	A	0.01386	0.002688	0.06452	0	0.767	0	NA	G	0.98614	0.997312	0.93548	1	0.233	1	NA	CCCCAATCCCTTCCTCCTT	CCCCAATCCCTTCCTCCTC	TCTGCAAGGCAATCCAGATCCT	TCTCAAAACCTAGAAATTGATTCCCC
BICF2G630703836	3	20505717	17621267	A	0.01423	0.002688	0.01429	0.1	0.7643	0	0	C	0.98577	0.997312	0.98571	0.9	0.2357	1	1	TGCAATTGAATGGAAAGAACTTGTGT	TGCAATTGAATGGAAAGAACTTGTGG	TGTCCACAGAGGCCTCAATCC	GACTGTGAGGCAGGAAATGTT
TIGRP2P382710_rs8664655	32	31172677	28250646	A	0.01439	0.005464	0.04286	0	0.7414	0	0	G	0.98561	0.994536	0.95714	1	0.2586	1	1	GTCTTATCTGAGTTTTCTGGGTGCTA	TCTTATCTGAGTTTTCTGGGTGCTG	CAAGCCTGTGGTGGAGTCAAA	CTCACTGATATTCTAGATATACATTTCTGTGG
BICF2P225206	5	41978918	38980087	C	0.01619	0.02459	0	0	0.7595	0	0	T	0.98381	0.97541	1	1	0.2405	1	1	GGCTTTCTGGCAGCATCTTAC	GGCTTTCTGGCAGCATCTTAT	GGCCCAGGACCACGTCT	GCACAGTTACCTGCTGGAG
BICF2G630580879	6	48887492	45830988	A	0.01786	0.02703	0	0	0.7787	0	0	G	0.98214	0.97297	1	1	0.2213	1	1	ACATCAAATTTAAGACAGATGCTAAGGAGT	CATCAAATTTAAGACAGATGCTAAGGAGC	TGGAAGACACCACATTAATGAGACATTGA	AACTGTTCTGCTTTTATCCTCCAAA
BICF2P153324	1	109525478	106637455	T	0.01792	0.02174	0	0.04	0.7719	0	0	C	0.98208	0.97826	1	0.96	0.2281	1	1	CTCCCATCAGCCCTTATCCTT	CTCCCATCAGCCCTTATCCTC	GGCAGCTGAAGCAGAACCA	TCTCCATCCTCTGCCCAC
TIGRP2P393486_rs8750163	34	12339549	9332550	A	0.01964	0	0.02143	0.16	0.7727	0	NA	G	0.98036	1	0.97857	0.84	0.2273	1	NA	TGGACTGCTTTCAGATGGCA	GGACTGCTTTCAGATGGCG	CAAGGCATGAAGGCCTGAGC	CGCCCTGACTTCCCTCT
BICF2P1059843	15	66003018	62984608	G	0.01971	0.02446	0	0.04	0.7803	0.1667	0	A	0.98029	0.97554	1	0.96	0.2197	0.8333	1	AAAGCTGGAATTAGTTATTGTGATGGC	CAAAGCTGGAATTAGTTATTGTGATGGT	CGTTTGCATGCACACATTGGG	TTGAATATTAAGGCACAAAGCTGGA
BICF2P1029924	10	15148009	12158740	G	0.025	0.03514	0.007143	0	0.7538	0	0	A	0.975	0.96486	0.992857	1	0.2462	1	1	GTTCAGATTGAGGCCTAATGTTGTC	GTTCAGATTGAGGCCTAATGTTGTT	CGGACCCAGGAATGGTACATCT	GGGAAAAAGAAACTTACTCAGGAGA
BICF2G630128194	37	13737113	10737257	C	0.02669	0.02419	0	0.12	0.7652	0	0	T	0.97331	0.97581	1	0.88	0.2348	1	1	TCCCCTAACCTTTTTATACAGCTGG	ATTCCCCTAACCTTTTTATACAGCTGA	TGCCCCAAAGCTGCCTCTA	CGAACCTGAGAAAACTATCCTCAT
BICF2P711452	22	47524793	44576904	T	0.02669	0	0.1071	0	0.7746	0	1	C	0.97331	1	0.8929	1	0.2254	1	0	GCCTTAGTTTCAGGCAGCATTCTAT	CCTTAGTTTCAGGCAGCATTCTAC	AAAATCATAATAACTCCTAAGTACATCTACACCTGTTAAA	GCTTTTGTCTTTGAAGTGGAGC
BICF2S23526960	1	22764373	19757907	C	0.02679	0.04032	0	0	0.7819	0	NA	T	0.97321	0.95968	1	1	0.2181	1	NA	CTTCAGTGTATCTGACTGGGAGAG	CTTCAGTGTATCTGACTGGGAGAA	TCACTAGGCTTCCTTGAAGCAAAAGT	GCCTGTTTCTGAAGTCAAGTTCTAC
BICF2P1031850	7	61041974	58062043	C	0.03214	0.01081	0	0.28	0.7405	0	0	A	0.96786	0.98919	1	0.72	0.2595	1	1	TCAGCAATCCCTGAAGATGGG	TTCAGCAATCCCTGAAGATGGT	GGCCCAAGTTGCTGGTTTGA	CACTTGCAAGGGTTTGTTATAAACTT
BICF2G630186763	5	46106356	43104209	C	0.03393	0.002703	0.1286	0	0.7405	0	0	T	0.96607	0.997297	0.8714	1	0.2595	1	1	AAGTGTGTGTTTGCATTTCCCTC	AAAGTGTGTGTTTGCATTTCCCTT	GGCTTGCATGCAGACTGTGTA	CCCAGTAGTATGTTGAGAATCAGTG
BICF2S2312188	18	55597108	52571108	A	0.03559	0	0.05	0.26	0.7481	0	0	G	0.96441	1	0.95	0.74	0.2519	1	1	GCATCCCTTTCCCAGCACA	CATCCCTTTCCCAGCACG	TGCCCAGATTTGCAGACCCT	AGAGATAGAGGTTAAGCTTATGCCA
BICF2S23626182	1	9024048	6020825	A	0.03571	0.002703	0.1357	0	0.7273	0	0	G	0.96429	0.997297	0.8643	1	0.2727	1	1	AACTCCTTGCTTGACTGCAGA	ACTCCTTGCTTGACTGCAGG	ACCTTCTTGGCAACAGCTCCT	TGAGTCACCCAGTTCTGGAA
BICF2P272829	20	39056905	36061130	A	0.03571	0.03243	0.01429	0.12	0.7595	0	0	G	0.96429	0.96757	0.98571	0.88	0.2405	1	1	GAGATATGTGCCACTTCCAGGT	AGATATGTGCCACTTCCAGGC	GAACATGGCCAAGTGACCCG	AGCAATGAAATGCAGCAGAGG
BICF2S2305942	37	21134084	18134408	T	0.05536	0.002703	0.15	0.18	0.7481	0	0	G	0.94464	0.997297	0.85	0.82	0.2519	1	1	GCTGGCGTTGATGCAGTT	GCTGGCGTTGATGCAGTG	ATGAAGCTGTCTCCCGCCT	GCCAAAAATAACCATGCTTTTGAGT
BICF2P1138616	5	66239640	63241590	T	0.06964	0.07297	0	0.24	0.7871	0	0	C	0.93036	0.92703	1	0.76	0.2129	1	1	CCACTAGTGAGAAAAGCAAGGTGATAT	CACTAGTGAGAAAAGCAAGGTGATAC	CCCAGGGGCACTCTCAGTAA	AGTGAATTTGAATCCTGAAAACCCA
TIGRP2P247920_rs8757526	18	32992399	29972549	C	0.07651	0	0.2571	0.14	0.7633	0	0	T	0.92349	1	0.7429	0.86	0.2367	1	1	ACTTTCCTGCTTCCTACCATGTTAG	ACTTTCCTGCTTCCTACCATGTTAA	AGTGCAGACCAAACTAGGGTGT	CTGCCTGGACTGTCTTCTTTT
BICF2P1262794	19	54243545	51221400	T	0.08423	0.02446	0.2286	0.12	0.7765	0	0	C	0.91577	0.97554	0.7714	0.88	0.2235	1	1	GAATGAGACCAGAGACTGGCA	AATGAGACCAGAGACTGGCG	TCACTGACACAGGCACCATGT	TGGAAGGAATAAATGGAATGAGACC
BICF2P41054	25	15301483	12314463	T	0.08423	0.05435	0.01429	0.5	0.7822	0	0	C	0.91577	0.94565	0.98571	0.5	0.2178	1	1	TCAAATATCCCATGGGAAAAGTCACA	CAAATATCCCATGGGAAAAGTCACG	TGCCTTGGAACACCACTCGT	ACATCTCTTGGGAAGAAGGCAT
BICF2P1060759	33	17172826	14129974	T	0.1385	0.0765	0.2714	0.22	0.751	0	0.1667	C	0.8615	0.9235	0.7286	0.78	0.249	1	0.8333	CCCCGAGGTCTACGAGCA	CCCGAGGTCTACGAGCG	TGAGTGCCAAACCCGTGAGT	GCTGGTTGCCCCTTGTAG
BICF2S23241117	29	13728341	10725198	C	0.1405	0.0419	0.4143	0.08	0.767	0.6667	0	T	0.8595	0.9581	0.5857	0.92	0.233	0.3333	1	TGAAGCTCAAGTATATAAATGCCCCTC	TGAAGCTCAAGTATATAAATGCCCCTT	TGCTGCCCAACCCCTACT	TGGAGAGCAGCTTACTTGATAGT
BICF2P1168261	9	47831552	44506593	C	0.1732	0.1108	0.4	0	0.8144	0	NA	T	0.8268	0.8892	0.6	1	0.1856	1	NA	GCCAAAGACTGTTAGTATATACCATAGAAGAG	GCCAAAGACTGTTAGTATATACCATAGAAGAA	AAAGGGGATATTATTAAGGTGATAAATAATTAAAAGTCAA	AGAGAGATAAGCATCTGCCAAAGA
BICF2S2449563	22	55350528	52403809	T	0.2339	0.227	0.3286	0.02	0.7576	0	0	C	0.7661	0.773	0.6714	0.98	0.2424	1	1	CACGGAGAACCTGGGAGAA	CACGGAGAACCTGGGAGAG	GCACTGGTCCCAAGGGTG	CAACTTACTGACGCAGAGTAGAAAT
BICF2P223300	4	28963470	25752965	C	0.7143	0.95956	0.7571	0.7	0.1873	1	1	T	0.2857	0.04044	0.2429	0.3	0.8127	0	0	GACAAAACACATGGAGTGGGG	AGACAAAACACATGGAGTGGGA	CCACCTAAACATTTCTTAAAATGTTCTCTCCA	GCAACACAGACCTGCTTGA
BICF2P608527	35	16606065	13596736	T	0.7661	0.92973	0.6857	0.82	0.2605	1	1	A	0.2339	0.07027	0.3143	0.18	0.7395	0	0	CCAATAGCTGCTCACAAAAAATAGGT	CCAATAGCTGCTCACAAAAAATAGGA	CCTGCCTTGGAGGAAAGGCT	GGGTACTGAGCAGAAATCCAA
BICF2P363248	38	10272184	7272383	A	0.8297	0.94624	0.5	0.8913	0.2308	1	0	G	0.1703	0.05376	0.5	0.1087	0.7692	0	1	TGTCCTGGCTGTCCTGGTA	GTCCTGGCTGTCCTGGTG	CAAAAGAGGAGAGAGGTGTCCTCA	GTCATTTGCCTCTTCTCAATCTCT
BICF2P263751	23	44284984	41233232	G	0.831	0.7919	0.96875	0.8649	0.04167	1	1	C	0.169	0.2081	0.03125	0.1351	0.95833	0	0	GTGCTGGAAAAATCAGTAAACAGTCTAG	GTGCTGGAAAAATCAGTAAACAGTCTAC	GTGTTAGGATCAGCTAATTAAGTTTCATTTCTTCTC	AACATGGACAAGAAGCAAAAGAGA
BICF2P1165732	17	39102934	35992400	C	0.8433	0.98864	0.5896	0.98	0.2656	1	1	T	0.1567	0.01136	0.4104	0.02	0.7344	0	0	GTGTGTTTGTTACCGGGCG	TGTGTGTTTGTTACCGGGCA	ACTTCCCGACGGCGCT	GAGAACACACCAGGAGTCAATG
BICF2P259521	1	51632306	48589923	G	0.94107	0.91081	1	1	0.286	1	NA	A	0.05893	0.08919	0	0	0.714	0	NA	ACAGTGGGGTCAACACTCG	GACAGTGGGGTCAACACTCA	AGCACTGTCACTCTGCACACA	AGCAAACAAAAACAACACATTTAAGACA
BICF2P1448058	15	47012442	44001348	A	0.94182	0.92582	0.97826	0.95833	0.2442	1	1	G	0.05818	0.07418	0.02174	0.04167	0.7558	0	0	TGAAAGGAATTCTCCATGTCCCA	TGAAAGGAATTCTCCATGTCCCG	TTTTTCACTAGTCATTGTGAATGGAATTGGG	GTTGAACAGGAAGTAGTCTTCCC
BICF2P697921	9	38627593	35306037	C	0.95863	0.95628	0.95	1	0.2318	1	1	T	0.04137	0.04372	0.05	0	0.7682	0	0	GCTTGTCAACGTTCCTGATTCAAG	GCTTGTCAACGTTCCTGATTCAAA	CAGAGCAGCACCGTTGGG	TCTGCTCAGAGGCAGGG
BICF2P1191359	20	50991317	47988327	G	0.96992	0.95322	1	1	0.2264	1	NA	T	0.03008	0.04678	0	0	0.7736	0	NA	ACAACCATTTGTACCCCCCTC	GACAACCATTTGTACCCCCCTA	CCTACCCACTGGTTTGGTGC	ATAGACAGTGGTTGGTTGCAAAT
BICF2G630165989	6	17930754	14921568	T	0.97331	0.95968	1	1	0.2178	1	1	C	0.02669	0.04032	0	0	0.7822	0	0	CTCCTGAGACCTAAGGGCA	CTCCTGAGACCTAAGGGCG	TTCTCTGGCTCTGCCTTTCCT	CAATTCTAGGAAAAGGCAATGAGC
BICF2P1368599	31	19102533	16093860	A	0.98393	0.997297	1	0.84	0.267	1	1	G	0.01607	0.002703	0	0.16	0.733	0	0	TCTTAGTTGTCGTTTCTATGGCCA	TCTTAGTTGTCGTTTCTATGGCCG	ATGGTGATGACAATTTGCTGGGAAAA	CAGCTATTCACTGTCACTTCCTC
BICF2G630126293	37	9384374	6384447	C	0.98577	0.98387	0.98571	1	0.2765	1	1	T	0.01423	0.01613	0.01429	0	0.7235	0	0	CATGAAGGGCACATGGTGG	TCATGAAGGGCACATGGTGA	GTCTCCGAGCAAAGTGTAATTTGATGAA	CATGTTTAGTCTTAGCAAACAGGGA
BICF2P866415	27	19433864	16423267	A	0.992857	0.994595	0.992857	0.98	0.2376	1	1	G	0.007143	0.005405	0.007143	0.02	0.7624	0	0	CAATAAGGAAACTTGGCCTTTGTCAT	AATAAGGAAACTTGGCCTTTGTCAC	GGGCAAACACTTTCATACTGAAAAGTTCT	CCTCTAGGAGGCAGCATAATATAGT
BICF2G630409723	30	17278701	14288568	G	0.992857	0.994595	0.98571	1	0.2863	1	NA	A	0.007143	0.005405	0.01429	0	0.7137	0	NA	ATCCCCTCTTCTAGAGTTTTGCG	CATCCCCTCTTCTAGAGTTTTGCA	AGTCCAAACCCAGGTTAGGCA	GTTTACCATGGCCATGTTCACTAT
BICF2G630340139	3	44667313	41810394	T	0.992883	0.98925	1	1	0.2412	1	1	C	0.007117	0.01075	0	0	0.7588	0	0	CCTTCTTCCATATGCTAGGTGCTTT	CCTTCTTCCATATGCTAGGTGCTTC	ACCATCAGACACGACTGGGG	GGGTCTGTGTTTTCTCCTTTTGG
BICF2P924889	19	7778424	4776127	T	0.994624	0.991892	1	1	0.2917	1	1	C	0.005376	0.008108	0	0	0.7083	0	0	ACAATTTTATTCCCCCATTCTACCCA	CAATTTTATTCCCCCATTCTACCCG	TGGCACAACATGCACACAGG	CCAATGTAAGGTAAAGAGTAAGAATATATTCTTCA
BICF2G630276750	28	10728062	7729556	C	0.996416	0.997283	0.992857	1	0.1856	1	NA	T	0.003584	0.002717	0.007143	0	0.8144	0	NA	GACCAGAGAAAGAGCCCTATTCC	GACCAGAGAAAGAGCCCTATTCT	GAAGTGCTCCAGCAGGGC	GTCTCCCTGGAGGGCA
BICF2P1181690	2	30694632	27851826	A	0.996429	0.994595	1	1	0.1818	1	0	G	0.003571	0.005405	0	0	0.8182	0	1	AGACTGGAATTTTAAGGGTTCGCA	GACTGGAATTTTAAGGGTTCGCG	AGGCAATATTAGCAAAATGAGAACAATATGACTTTT	TCTTCAGTGGTTTGTAAGGCAAG
BICF2P758526	7	25318558	22349761	G	0.996429	0.997297	1	0.98	0.2224	1	1	C	0.003571	0.002703	0	0.02	0.7776	0	0	TGTCTCAATCCACATGACACCC	TGTCTCAATCCACATGACACCG	GGGCCAGTCCTGGTCTCC	GGAGGGATGGTCTCCACTT
BICF2P164675	5	5556488	2555798	G	0.996441	1	0.98571	1	0.2061	1	1	A	0.003559	0	0.01429	0	0.7939	0	0	GGAGTTTTATGCTGCTGAGACC	CGGAGTTTTATGCTGCTGAGACT	TGTTACTTATGGCTTCTCCTTGAAAAGACT	GACAACTCCGCAGCCC
BICF2P1167270	2	50717731	47852734	C	0.998214	0.997297	1	1	0.2689	1	1	T	0.001786	0.002703	0	0	0.7311	0	0	TCCCCCTCCCTTCCTCTC	TCCCCCTCCCTTCCTCTT	GCAAACAAAAGAAGCCAGGAAATGGT	CTTTTTTAGGGTCACAGGTCTCT
BICF2G630100094	25	34689509	31699552	A	0.998221	0.997312	1	1	0.1913	1	1	T	0.001779	0.002688	0	0	0.8087	0	0	GCAAACCTATAAAGTGCTTTCTTGTGT	GCAAACCTATAAAGTGCTTTCTTGTGA	GGAAAATGCAGGCCATATGGTCA	GGTGGCAAATTGGCAAACC
BICF2P239653	16	15476260	12524995	G	0.998221	1	0.992857	1	0.2576	1	1	C	0.001779	0	0.007143	0	0.7424	0	0	CCTCTAAAGTCTGTGCACATCAC	GCCTCTAAAGTCTGTGCACATCAG	ACCCACACATCCCTTCTCTGC	TCTCGTTGCTTTCCCAAGTG
BICF2P57528	24	3521504	523951	C	1	1	1	1	0.2148	1	NA	T	0	0	0	0	0.7852	0	NA	CCGGGCTGGATTTGAACG	ACCGGGCTGGATTTGAACA	CCTGGCTGTGAAGCAGAACA	CGCAGATACGCTCTTCCAG
BICF2G630197064	26	38215092	35147391	C	1	1	1	1	0.2424	1	1	T	0	0	0	0	0.7576	0	0	GGGAACCCACGTTATGCTATTTC	TGGGAACCCACGTTATGCTATTTT	GAGACAAATAAAGCAAACCTTTAGATTTGTGTGA	CTGAGTTCTGCTCCTTAGGC
BICF2G630662749	13	35146152	32107117	A	1	1	1	1	0.251	1	1	G	0	0	0	0	0.749	0	0	ATAAATAAATAGTAACTCACTCCTCTGCTTGA	AAATAGTAACTCACTCCTCTGCTTGG	GTCTACTTGCTTAAAATATACAATGCCTAGTCAC	CCAGGCACACATTTTGCATAATAAA
BICF2P201328	34	24537278	21526852	C	1	1	1	1	0.2567	1	1	T	0	0	0	0	0.7433	0	0	CTCCTGGACAAATGGGAAGAAC	CCTCCTGGACAAATGGGAAGAAT	TCAGTTCAAATTATTAAGCATACTATATAAAGTGACCATT	CCCTTAAAGCAAAGATTGGTCTCC
BICF2S23344205	37	3943109	943096	C	1	1	1	1	0.2595	1	NA	A	0	0	0	0	0.7405	0	NA	TGCACCCAAGTGTAACCCG	TTGCACCCAAGTGTAACCCT	TTCCAAGGAGTTGCAAGTGCG	CTTCCTTGCACATCACCTGTC
BICF2P400484	8	56398878	53361907	G	1	1	1	1	0.2917	0.8333	1	A	0	0	0	0	0.7083	0.1667	0	TGGAACTGCTGGGCTACAG	TTGGAACTGCTGGGCTACAA	CCTCCTTCTATCACTCTTAACTACCCCA	CAGATTATGACCTAACGTGCCTT
BICF2S23225775	14	27153238	24204531	C	1	1	1	1	0.3053	1	1	T	0	0	0	0	0.6947	0	0	CCAAAGAAACTTATGCCCCCAG	CCAAAGAAACTTATGCCCCCAA	CCTCTCAAGCCAAGTTGAAAGAAGG	CAGCATGGGTCATCTCATCTC
BICF2S2305845 †	17	22151713	19170438	G	NA	NA	NA	NA	NA	NA	NA	A	NA	NA	NA	NA	NA	NA	NA	GGAGTTGTCTTGGCACCCC	GGAGTTGTCTTGGCACCCT	GCTCCTTCTGCCTCAGTTTCC	CCCTTACATGGTGTGTAATTTGGA
BICF2P1334457 †	19	9970522	6970430	A	NA	NA	NA	NA	NA	NA	NA	G	NA	NA	NA	NA	NA	NA	NA	CAATTTTCCATTCAGACAGGCACA	AATTTTCCATTCAGACAGGCACG	CCAGGCTTAGGAACCAAGACACA	AGTGAAGTACATAAATAAATCTGGCAAACA
BICF2G630504215 †	24	21819458	18822452	C	NA	NA	NA	NA	NA	NA	NA	T	NA	NA	NA	NA	NA	NA	NA	CCATGTGTCATAGCTGGGATCC	CCATGTGTCATAGCTGGGATCT	TGGCATTCGGAAGACCACTGA	CCACGTTATAGAGTCTGATGGGAT
† These SNPs were filtered out from the final dataset due to low genotyping rate
†† Only 3 and 4 samples for golden jackals and foxes, so the allele frequency is not representative of the population

## Sheet: Other tested SNPs
SNP name	Chr	Position (CanFam2)	Position (CanFam3)	Allele 1	Allele 2	ASP1_SEQ	ASP2_SEQ	LSP_SEQ	STA_SEQ
BICF2P1248726	1	77205567	74149655	A	G	CATCGTTTCTACTCCTTATAACCACCT	ATCGTTTCTACTCCTTATAACCACCC	GCACAGATACTTTTCTTTCATTTGTGGCT	GTTTGGAGAAGAGCCCACC
BICF2G630708417	1	7285492	4283592	A	G	CTTTATTTCATCGCTCTGTTTCAGAGT	CTTTATTTCATCGCTCTGTTTCAGAGC	CCCTAACCATTCCACAAGCCC	CACTTTATTCATGGCTGATGTTGC
BICF2S23430831	1	52570732	49526248	T	C	CATGGAGGGTCTGACCCTTTTA	TGGAGGGTCTGACCCTTTTG	TCCCCCTGTAGGTTTTCCCATT	GCTCCCTCATGGGATTTCTC
BICF2S22916508	1	70001988	66946428	A	G	AAGTCTCTGGAGAATTGAAGAAACTGA	AGTCTCTGGAGAATTGAAGAAACTGG	CGTGTGATATGCACAGAAACTATTCTTCC	GAAGTTTTGGAGAGTGTAAAGTCTCT
TIGRP2P16985_rs8552105	1	23457346	20450940	C	T	AAACACCAGTGAAAGCAAGCATAC	TTAAAACACCAGTGAAAGCAAGCATAT	CCCATATAGAATGTGGCAAATGTTCTGAA	CTGCTTTTGGCTTCCCCTTA
BICF2S23260488	1	74219408	71162763	A	G	CGAGAGCATTTTCCTTTGATCAATTTCA	CGAGAGCATTTTCCTTTGATCAATTTCG	CCTGGGTGGTCTCTGAACTCT	TGGTAACATATAATCAGCTTTCCTGC
BICF2G630716415	1	32912379	29869145	C	T	GAAACCAGTGCAAGCTGACTAC	GGAAACCAGTGCAAGCTGACTAT	AGCCACATTGTTGGAGACTGTGA	CCCCATCCACCTGGGAA
BICF2S23258513	2	31799697	28955479	T	A	CGTACATACGTCCTCTGGGACA	CGTACATACGTCCTCTGGGACT	TGCCGGGTGGAGAACGAT	GGGAACTAATGGAAATGTTACGTCC
BICF2P1195426	2	81572689	78678534	A	C	AGTTACCAAACTTACTGACAGTTAAACCT	GTTACCAAACTTACTGACAGTTAAACCG	TCCCACACATGCCTCGGG	CTCATCAAAGTTGTTAAGGAAGAGGT
BICF2P541712	2	42206098	39356128	T	C	GAAGCAAGCATTTTATTTCACAAATAGTCAT	GAAGCAAGCATTTTATTTCACAAATAGTCAC	CCTGCTCCTCCCACATTCTGA	CCTGACAAAGTGTAGGGATAATGAA
BICF2P723944	2	38922832	36073089	A	G	CCACAGGGTCTTTTCATGTTCAGA	CACAGGGTCTTTTCATGTTCAGG	CACACAGATGCACACAGCCA	TGCTTCTTTAAGGGATCATTATCTGC
BICF2S23434954	2	55306711	52436138	A	G	TGGCATGCCTATCAACACCT	TGGCATGCCTATCAACACCC	TGCCCTGAGAAGAGGCAAGT	CCTTAGGCCAGAACCATTGT
BICF2P547826	3	93287324	90459669	G	A	TGAAATATAAATTATGCACGAATGGTTCCG	TGAAATATAAATTATGCACGAATGGTTCCA	CACAAAAGTACTAAATGACATGTTTTAGTATAAATACTAT	GAAATGACTTGAATTGGATGTCTGAAA
G233f29S171	3	25427121	22543894	G	T	GTTACCTACTAAGTAGGGATGAAAAGTCTG	GTTACCTACTAAGTAGGGATGAAAAGTCTT	TCTCCCTCTCCCTCATCTCAGAA	TTGTCATGCTTCCTTTGCTTAGAT
BICF2S22947559	3	61835833	59016055	G	T	CAACTTGTTCTTCTAATTACTCCACCC	CCAACTTGTTCTTCTAATTACTCCACCA	TCAGGGTGAGTGGCAGCA	TCAGGCCTGGATCTTCCC
BICF2P1160261	3	76009002	73183348	C	T	GAAATTTTCTGAACACAGTGTGTTCATG	GGAAATTTTCTGAACACAGTGTGTTCATA	GGGAAAAAAAGTTGAATCTGCTGAAGACA	AGCATTTCTCTACCAGGTATTGGA
BICF2P93316	3	83669119	80846339	T	C	CCAGCAGCTGGGAAGTTAGTT	CCAGCAGCTGGGAAGTTAGTC	TCCAGTGCAGAGCCTCCAA	GTCTTGCTGGCAACATCCC
BICF2P750212	3	60257942	57394928	A	G	AAAGCAATATTAACTTTGGAGGTTGGAA	AAAGCAATATTAACTTTGGAGGTTGGAG	TCTGTGAATTTTTATTTCAATTACTGATAACAGCATGT	CCCTGAAAAAACAAAATACAATAACCAACA
BICF2P181287	4	91466646	88259417	T	C	CGTAAAACTCCCAGGATGGAGT	CGTAAAACTCCCAGGATGGAGC	CTATGGGCCGTGAGCAGC	GCTCACTCTTTGGTTCAAGCC
BICF2P1324212	4	49273672	46070846	G	A	TGAATTTTGACTAAAACAATCCATCCCG	TTATGAATTTTGACTAAAACAATCCATCCCA	ACATACTTCACTCAGGATTAATAAGTTTTGAGGG	ACTTGAATATTTTTAAGGAAAAGTAAATATTATGATCATT
BICF2P1334368	4	32788512	29578714	C	T	CCTGCTTGTGACATCCCG	GCCTGCTTGTGACATCCCA	AGGTTCCCTGTGCAGGTCC	CAGTTCTTATTAAGGAGAAGGCAGC
BICF2P1433082	4	25758461	22547366	G	A	GAGCATGTATAATCAGAGGAGGGG	GAGCATGTATAATCAGAGGAGGGA	AAGGGCTAGGCTGGCCTAC	GCTTCTGGAAGCTCAGGG
BICF2P742360	5	68009762	65013617	T	C	GCAAAAGCCAGACGTGTACT	GCAAAAGCCAGACGTGTACC	GCACGGCTGTGTGCCT	CCCGGAAAGGAGCGATAAGA
BICF2S2412625	5	74810286	71804501	T	C	CAAATATAAAATGCAGATGTTGGACACTGA	AATATAAAATGCAGATGTTGGACACTGG	GCCTACCTGCATGATGACCC	CTAGTTGGGCTAGAGACTCCATA
BICF2S2459689	5	39025380	36032999	T	C	CTACAGCTGTCTTGACTGCTCA	ACAGCTGTCTTGACTGCTCG	GCTTCAACAGCTGGTGAGGG	CACTGGGAGAAAAAGGCCTC
BICF2P652278	5	57954486	54952643	T	C	TGGAAAGGTTATCACTAGAAAGAATATGAGT	TGGAAAGGTTATCACTAGAAAGAATATGAGC	TCCACAACTGTAAGACAGACGGTG	GGAAGCTACACGTTGTGGAA
TIGRP2P71121_rs8749800	5	44369645	41370228	T	G	GTAACAGGAGGTACTTCCAAAGGA	ACAGGAGGTACTTCCAAAGGC	CAGGGGGTGGGCCCATA	GCAGTGTGCAAATTTGGATCAA
BICF2G630582485	6	47231693	44168333	C	T	CCCTTAAGGCCAACTTCTCTCTG	CCCTTAAGGCCAACTTCTCTCTA	CAATTGATTTTGCCTGGGAGGATCT	ACTCTCCTTTTTCAAGGCTGC
BICF2P558739	6	62020121	58960364	A	G	CACAGATTATGTGGCTCCTGGA	ACAGATTATGTGGCTCCTGGG	CTCCAGAGATGCTAGGTGCTGA	CGTGCAAATCTGCTAGATACCC
BICF2P385532	6	75368737	72306419	C	T	CTCTCTTCCCTCAAATGTATGCAAAAG	CTCTCTTCCCTCAAATGTATGCAAAAA	TCCTTTTGACTTCCTTGGAGATTGTTAGAT	TGTGTCTTCTTTCTGTCTCTCCT
BICF2P176847	7	58159113	55178223	C	T	CCATATAGAGAACTGATTCCTATCACCAG	CCATATAGAGAACTGATTCCTATCACCAA	CCATCAGAAATTGCATTGGAGGGAA	CTCTTGCCTAGTCTCCTTAGTTTTC
BICF2G630554634	7	31110259	28143067	G	A	GGTGAATGTTCTCCATTGACCG	GGGTGAATGTTCTCCATTGACCA	TCAAAATAACTCAATAGGGCTATTGGATGGA	TTTTAGGAACATTCCTCCCATGC
BICF2S23537383	8	51475506	48437247	T	C	GACCTCAACACTTCTGTTCCTAGTAT	GACCTCAACACTTCTGTTCCTAGTAC	CCCATTTGGGAAACTGGCCAA	CCTCCCAAAATCAGAAACTAAGGT
BICF2S23625139	8	37547934	34517945	T	C	GCTTTTGTAGTCTTTTCCTTAGACTCCAT	CTTTTGTAGTCTTTTCCTTAGACTCCAC	ATGAAATATGAATAGGCCTTTAGAAAAGTGTTATATCTTA	ACAGGGAGCAGGCAACT
BICF2S231667	9	31641537	28318220	C	T	AGAGCTTTATCACCAAGTCCTTCTAC	AAGAGCTTTATCACCAAGTCCTTCTAT	ACCATAGCAGTGTATCAGTCAGAATGG	CTATCATTAAGGTGAGCACAAGCA
BICF2S23743595	9	32787377	29464602	A	G	CGCTTTCAGCAGAAAGGGAATTTTAAA	CGCTTTCAGCAGAAAGGGAATTTTAAG	TCCTCATTTTTACTTTCCCCTTTCTTTTTGG	TTGATGGAATCAAGCAGATGACG
BICF2P1331932	9	56292817	52947437	T	C	CCTGTACAGAAGGGCTGACA	CCTGTACAGAAGGGCTGACG	CCAGCCTCCCCGTCCT	TCCCTCTTTCCCCCTTCC
BICF2P912680	9	51060361	47733089	C	A	CTCAACCAAGCTTGTCAGCC	ACTCAACCAAGCTTGTCAGCA	GGGAAAAGTCCCAGGTCCCA	CAAAACCCTTATTTGCCTTGTAAATCA
BICF2S23241552	9	62634002	59293285	A	G	ACCTTTGACCAATGGACTCCAT	ACCTTTGACCAATGGACTCCAC	GGAGCCAGGAGAACACATCTGA	CCCTTTCTAGCTGGTCCCC
BICF2P1270711	10	7694400	4709463	A	G	CCTTTACCTTTTGTTACTTTGGTCAGA	CCTTTACCTTTTGTTACTTTGGTCAGG	AGTGCCAGGAACCCGCA	CTGCTTGACTTTTTTCCCTTTACC
BICF2P590306	10	68942918	65788249	A	G	GCTGCTAGCTGACCTCTTCA	GCTGCTAGCTGACCTCTTCG	GAGAGCCCGGTGATCTCGA	GCCCCGTGATTTACTTCATCA
BICF2P324205	10	49315986	46188829	G	A	GCAACAAATGCTATAAAGGAGTTAAATGC	AGCAACAAATGCTATAAAGGAGTTAAATGT	CTCCACATCAGGATCTGGCTCA	CAATGCGAAGCAACAAATGCTA
BICF2G630304255	11	63156122	60127480	A	G	ATTAGCAGCATATGGCTGTCCTATAA	ATTAGCAGCATATGGCTGTCCTATAG	CAGCAGGCAACCCAGCA	TGTAGCATCAATCAGATGTCAACATT
BICF2P292180	11	46860855	43831514	T	C	GTAACACTTACTGGACTCTCACCTTAATA	ACACTTACTGGACTCTCACCTTAATG	CAAAATGTGAAGTACCCGGCAAGT	CCGCTTTACTAAGAATGGAGGAAG
BICF2S23655353	11	69345277	66314997	G	A	CAACTATACTCCCTCTACAGCACC	ACAACTATACTCCCTCTACAGCACT	GCCAGATAATACTAATATAGTACTTGGCAAATATTAACTC	TACTGAGCAGCATTGAATTACAACT
BICF2G630297140	11	25266339	22258742	A	G	GGCCATGAGTCACAAATTACCAA	GGCCATGAGTCACAAATTACCAG	CCTCCTCACTGGCTGGCAAA	TGCCCATGGTCAGAGACA
BICF2S2306554	11	17199715	14195555	A	T	GGCATCACTCTTGGGTTCTTCAA	GGCATCACTCTTGGGTTCTTCAT	GGCAGCACAGAGGGCCA	CCTCCTGTCAGTCTTGCCT
BICF2P1192641	12	56919428	53918238	C	A	TGCACATGGAAGTGGATCTCC	ATGCACATGGAAGTGGATCTCA	TCCTCCTTGGAGCAAGAACACA	AGCTATGAGCGACCTAAGACAT
BICF2P581017	12	28898732	25897168	T	C	GCTCTAGAAGGTTAACATTTGATGTTAATCA	GCTCTAGAAGGTTAACATTTGATGTTAATCG	CCGTATCTAGGTAGTGTACAGTATCTGATCT	ACGTAGGCTTATTTTGACTAGTTTCAG
BICF2P1426490	12	64017301	61016619	G	T	TTGTTAGTGTGCAAGCTGTTGTG	GATATTGTTAGTGTGCAAGCTGTTGTT	AGTAAATCCTGTCATGTTTAGTTTCACAGTCA	GCATTCTAAACACTTTATTGGGACTTG
TIGRP2P164447_rs8805986	12	42508598	39505848	T	C	ACTGAAGCCTTTAAGGAAGTGATACAT	ACTGAAGCCTTTAAGGAAGTGATACAC	GCACTGGGCATCCTAGGGAA	TCACTTCCATGATTCCCCACA
BICF2P344706	12	22948932	19947506	G	A	TGTGGTCCTTGATACAGACTTCG	CTGTGGTCCTTGATACAGACTTCA	ATCCACATGTCCTTCATGATGGAAGAT	AAATTAATCATGCTGTGGTCCTTGA
BICF2P711808	12	14564316	11560663	C	T	CCCACCGTTTGGGGAGG	CCCACCGTTTGGGGAGA	ACTTTCCACGGACACAGCCT	CTCCCTCAACCTCCTCTGT
BICF2S2336068	13	48041879	45108525	G	A	GCCTGAAATGAAATGATGCTAGCAC	GCCTGAAATGAAATGATGCTAGCAT	GGGATCTGTCCAGGCTCACA	AGTGTTTCTTTTTCTTTTCACTTTGCC
BICF2P983123	13	12052105	9014025	G	A	CAGAAGAGTGCAAAGGCACG	CAGAAGAGTGCAAAGGCACA	GGGAGCCTCGCAACAAAACA	GTGGTTTCATTTGCAAGGCAG
BICF2G630527650	14	37715922	34756929	T	C	CTAGTATTATCTTCTTCAGCTACACTTGGAT	AGTATTATCTTCTTCAGCTACACTTGGAC	TGCAGCTCTTTCTGCCAGTCT	GGCCAATAAATGCAAAGTGATTTCT
BICF2P1216688	15	3696989	697349	G	T	ACTAAAGACTTCAAGAAACAGGGTCTAG	AACTAAAGACTTCAAGAAACAGGGTCTAT	CAGTTTTAGGAACTATGCTAAATCCTAGGAATATGA	TTCATGTATGTCTGTCCTTCTCTACTT
BICF2S2352829	16	10229953	7251501	C	T	GGCATATGTTCTGAGGATAAAACGG	AGGCATATGTTCTGAGGATAAAACGA	ACAGGGTTTAGGCTGTTGCCA	GTCTGCAGTTTCTCCCCAG
BICF2G630111352	16	31993627	29040827	G	A	AAATTATTCTTTATGAAATGGTCTATGAAGTACCTC	AAATTATTCTTTATGAAATGGTCTATGAAGTACCTT	CCAAATTGAAATCCAGGAATCCAACTGA	TGTTCCAATACTGGTTGACATTACAA
BICF2G630847335	16	18014512	15066213	A	G	GTCTTCCTGCTTCTAGTTGGATGT	TCTTCCTGCTTCTAGTTGGATGC	GAGATACTGCTTTAAAGACACAGGGTCA	CACCCCAGTTAGTTCAGCG
BICF2G630207556	17	40261535	37150070	C	T	AGGTGATTACATCATCCCATCTCTTTTC	AGGTGATTACATCATCCCATCTCTTTTT	GGTGTCTGCATGAACAGTTTTGGT	ACAGCATCTCCATCCTGTTACA
BICF2P797744	17	23586816	20606032	A	C	ACTCAGAGGGGAAGGCTGA	CTCAGAGGGGAAGGCTGC	AAATTATATTTGAATGATATTTGTGGAAAATAGAAGGTTT	TGCAGAGTCCCTGGGC
BICF2P430719	18	56472383	53444473	G	A	CCTGGTCAGAAGCCCCG	CCTGGTCAGAAGCCCCA	CCCCAGAGGCATCGAGCTG	GTGCTCTCAAAAGGCACCC
BICF2P340794	18	14982699	11999152	C	T	GACCCTTCTCTAGCAGACCC	GGACCCTTCTCTAGCAGACCT	ACTGTATTGAGAGGCAGGCCA	ACAGTCTGAGTGCTACGGTG
BICF2G63043071	19	23635125	20621809	C	T	GCCCCCAGGAAAGTGGC	GCCCCCAGGAAAGTGGT	GGGTGACATCAGCCAGGACT	GAGCCAAACATCAAATGCACAA
BICF2P690052	19	49044174	46023384	T	G	CTCTCCCATGTCACTTGTGGAA	TCTCCCATGTCACTTGTGGAC	CCTGCGTCAGGGAGGACT	GGGCCTTTGGAAAATATGGTCAC
BICF2P1019450	19	32413989	29393062	T	C	GGAGGGATATACCTCTAGGACAAAAAT	GGAGGGATATACCTCTAGGACAAAAAC	CAGCACTCCACCAATATAGTTACCGA	TGCACAACCAAGGAGGGA
BICF2S23123229	20	45944339	42943687	G	A	TCCTTCCACTCACTGAAAGAATTCG	TCCTTCCACTCACTGAAAGAATTCA	CCTCTCCTGGCTCTTGACTGAA	GAGCCTTTTACCACCTGTTCT
TIGRP2P284084_rs9062333	21	34054114	30864790	A	G	TCTATCAAATAAATCTTCGTGCCTCTTAACT	CTATCAAATAAATCTTCGTGCCTCTTAACC	AAAAAGGGATAAATAATTTAATATATACATTGTGAAGTG	TCCTCTCTTAGATTCTTTTGGACTTCT
BICF2P52815	21	51707106	48514030	T	A	CAAGTACGCCTTTTCCATAACTTGA	CAAGTACGCCTTTTCCATAACTTGT	CCCCACCTCTACCTCCTCCA	TGCCAAATCTGCCATTCCTTTATAT
BICF2G630321255	22	20619764	17673448	C	T	TGGAGCATCTTGTGATAATTTTCTGC	GTGGAGCATCTTGTGATAATTTTCTGT	GCCATGTGGATACGCATTTTGATATTTTGT	GCAGTAGCATAATCCAAACAGGT
BICF2P739582	22	18850923	15904424	A	G	CCTTTCTTTGTCTTGCTGATTAACCTT	CCTTTCTTTGTCTTGCTGATTAACCTC	GGCAATCTGAGGAACAAGGCAA	GTAGATGGTGGCATGTTCCTT
TIGRP2P303209_rs9075554	23	26289293	23236937	A	G	CACTTTGCCTCTGCATTCTTCTT	CACTTTGCCTCTGCATTCTTCTC	CTCTGCATTTGGAGGCTGGG	ATTAGAGAGTGGGAAGAGTTCACTT
BICF2P1268177	24	37633119	34658488	A	G	CTGACATTTGAAACAGTTCTTTATCTGGA	TGACATTTGAAACAGTTCTTTATCTGGG	ACGGCAAGAGCTGAGACCA	AGTACAAACTCCCTTCTCTGACA
BICF2P92211	24	5179711	2179961	T	C	ATGCTTCCAGGTGTTTCCTATTCT	TGCTTCCAGGTGTTTCCTATTCC	CGTGCAGAGATGGTTTCCCA	CCCACTGAGAAAGGTGGACAA
BICF2P46265	25	18078566	15092459	T	G	CATCATATTCTCAACCTCTCAGAGACA	CATCATATTCTCAACCTCTCAGAGACC	TCCAGCCCTCCCTCAAATGT	AGAATGCATATGAAAACAGAGTTCCA
BICF2G630102018	25	36862617	33874702	A	G	TGGAGGCTCACTGTTTCTCTTT	TGGAGGCTCACTGTTTCTCTTC	TCAGAGAACCTTCAGGCTGGG	TCATTATGAACCCTGATAACTGCTCT
BICF2G630469072	25	13077688	10089861	A	G	CAGGGTAGGAATTAGAAAGAATACTGAGA	CAGGGTAGGAATTAGAAAGAATACTGAGG	ACAAACAAACAAACAAACAAAAACACACACA	ACTCCCATATATTTTAAAGAAGCTGATGT
BICF2P146997	27	47794957	44762316	C	T	GCTGAGACTAGAGCAGAACAAGAC	GCTGAGACTAGAGCAGAACAAGAT	CCTTCTCCCTAGCCAGCCG	GGGACCTCAGATTCCACTTTG
BICF2S22946651	28	25487216	22486757	T	C	GGCATTTATGTGGATTGAATCCCA	GGCATTTATGTGGATTGAATCCCG	CCAAGCAGAGAAGTTGGCCG	GAAAGCAGAGCCCAAGTGA
BICF2P991234	29	37934470	34943729	G	C	GAATTAACATTTGCATGACAACGTGC	GAATTAACATTTGCATGACAACGTGG	GGTTTGATTATCATAAATGAAGTTGGTGTCCT	CTTAGGTGGTGGACAATGTATGA
BICF2G630626298	29	28311535	25312246	T	C	TTGAAGACTTCTGCTGGTGGAA	TGAAGACTTCTGCTGGTGGAG	TTGTGAAACTGCCCAAAACTTGGT	CCCTGTAAGCAAGAAAACAGTAATCT
BICF2P838526	29	4258108	1256154	C	T	TCAATCCCCAAATCACACCTCG	TCAATCCCCAAATCACACCTCA	CACACAGCATAGCCTATAGGGGT	TGCGATTCGTCTCTGCAGT
BICF2G630411180	30	7789766	4801290	A	G	GTTATTTTGCCACAGGTTGGAGATTAA	GTTATTTTGCCACAGGTTGGAGATTAG	GGTATAATCACTTTTGAAATATAATCCTGTTAGTCTGCT	CCAAGATTATGAAAGATACTACTGAGGG
BICF2G630727706	31	5975683	2974937	A	G	GCCACAGAATAAAAAAGGAAGATACCA	GCCACAGAATAAAAAAGGAAGATACCG	CATGAGGTCTTCCCTCCACACT	GCACTTCCATCCCTAAAGCC
BICF2P452513	32	10412751	7450389	G	A	CTGAACCAACAGTACAGGCAAC	TCTGAACCAACAGTACAGGCAAT	CTTAGCTGTGAGCCTGGGTCT	TGGGCCAGCTGTGTGT
BICF2S23032408	32	36905584	33981986	G	C	TGGACTTTTAGTAATAGTTGAGGACACAC	TGGACTTTTAGTAATAGTTGAGGACACAG	AGGATTAACCCACATGGGCTCA	TCCCATGGTTCTAAAGTTCCAAAAT
TIGRP2P386601_rs9066100	33	15378492	12335231	G	A	GAAACACTATAGCCCAAAAAGTTGAGG	GAAACACTATAGCCCAAAAAGTTGAGA	AATTAAATCTCTCATACTATGTCTATAGAGCTAGAATTAC	CATCACAGAAGCCCGAAACA
BICF2G63079430	33	23124409	20083372	T	C	TGATGATCATTCATTATCAAACATTTCTGCAT	GATGATCATTCATTATCAAACATTTCTGCAC	ACAAGCAAGGTCTCAGCCTCA	GTTTCTCCCTCCTGTTTAGGTAATT
BICF2G63077185	33	30233587	27192326	T	C	TTCAGAACAGTGACTAAAGGCACT	TCAGAACAGTGACTAAAGGCACC	AAGAGTTCTCTCCAGCAGCCAT	TTCCCAAAGATTCAGGCTGTTTT
TIGRP2P400649_rs8986255	34	41390565	38385213	G	A	CACAAACGAACCACTGAGTAAAGAC	ACACAAACGAACCACTGAGTAAAGAT	AGTTAGTGACTATGCCGTTACTTTTAAGCA	TTCCTAGGCTTTTTTACACAAACGA
BICF2S23211373	35	3917812	917792	C	T	GTTGTGAGTCACCTGAGTGTTTAATTG	AGTTGTGAGTCACCTGAGTGTTTAATTA	CTGCAAATACTCAAGAGCTCTTAATAACTATGGA	GATTCTGGTTAGTTGTGAGTCACC
BICF2P1191989	36	9619558	6615417	G	A	CTACCTTCTGAGCACTTACCTTTAGAG	CTACCTTCTGAGCACTTACCTTTAGAA	TTTCGTGCTGTTGCAGTGCAT	CCACTCAAACACAATATCTGAAAGC
BICF2P1258804	36	21023303	17999649	A	G	GCGCTGTTGCACAATGAGTTT	GCGCTGTTGCACAATGAGTTC	GGGACACTCTTCCGCTGCT	CATCTGCGAGAGGAGAAATGT
BICF2P1240359	38	23105508	20105896	G	A	GGGTCCCCTCTGGAACATC	GGGTCCCCTCTGGAACATT	TGAATATGGCAAGAGGCCCCT	TGCTTCATTTCAAGAGAGGAAAGTT
BICF2P885495	38	26537886	23525635	C	A	TCATTTCATGTTTTTCGTTCCCGG	ATCATTTCATGTTTTTCGTTCCCGT	GGCACTACCGACCAGGGC	ACATCCCGCACGCATTTG
